# Supplementary material for: Weakness of Will and Varities of Practical Irrationality
Source: HighWire-hosted journal article supplement (doi:10.1136/bmjopen-2023-072984), 2003-01-01
Supplement: bmjopen-2023-072984supp002_data_supplement.pdf [file bmjopen-2023-072984supp002_data_supplement.pdf]

Supplementary Table 2:

| Variable                        | Definitions, classifications and details                                                                                                                                                                                                                                                                                                                                                                                                                                                                                                                                                                                                                                                                                                                                                                  |
|---------------------------------|-----------------------------------------------------------------------------------------------------------------------------------------------------------------------------------------------------------------------------------------------------------------------------------------------------------------------------------------------------------------------------------------------------------------------------------------------------------------------------------------------------------------------------------------------------------------------------------------------------------------------------------------------------------------------------------------------------------------------------------------------------------------------------------------------------------|
| Geographical birth origin       | Children not born in Denmark were grouped into Europe, Middle East, Africa and Far East.                                                                                                                                                                                                                                                                                                                                                                                                                                                                                                                                                                                                                                                                                                                  |
| Income                          | Household financial resources based on the disposable personal income (DPI)/adult over a full calendar year. The DPI is the amount of money that a household has available for saving and spending after it taxes have been deducted.<br><br>For cohabiting parents: Average DPI in the household was used.<br><br>For separated parents and parents living apart: The highest DPI was used.                                                                                                                                                                                                                                                                                                                                                                                                              |
| Employment status               | Family was defined as unemployed if both parents were registered as unemployed for up to six months, received unemployment benefits, had retired early or if they were students. The family was defined as employed if one of the parents was registered with work.                                                                                                                                                                                                                                                                                                                                                                                                                                                                                                                                       |
| Education                       | The education was defined as the highest attained education between the parents.<br><br>Education was grouped into:<br><br>Primary education (up to 9th grade), high school, vocational (technical) education, short-term higher education programs (e.g. diploma programs), medium-term higher education programs (e.g. professional bachelor programs such as nursing and teaching), bachelor and long-term higher education programs (e.g. bachelor programs at universities, graduate programs and PhD programs).                                                                                                                                                                                                                                                                                     |
| Child's severe somatic diseases | Interstitial lung disease, congenital rubella syndrome, congenital cytomegalovirus infection, degenerative disease of the nervous system, cancer in brain or meninges, microcephaly, megalencephaly, Smith-Lemli-Opitz' syndrome, trisomy 21, Down's syndrome and autosomal trisomies.                                                                                                                                                                                                                                                                                                                                                                                                                                                                                                                    |
| Mental disorders                | Mental disorders include neurodevelopmental disorders another mental health conditions and disorders:<br><br><i>Neurodevelopmental disorders:</i> General developmental disorders (intellectual disability), specific developmental disorders, (e.g dysphasia and dyslexia), pervasive developmental disorders (autism spectrum disorders (ASD)), attention deficit and hyperactivity disorders, ADHD, unspecified developmental disorders, hyperkinetic disorder, and unspecific developmental delay.<br><br><i>Other mental disorders:</i> psychoactive substance misuse, psychotic disorders, mood disorders, anxiety, dissociative, stress-related and somatoform disorders, eating disorders, sleep disorders and medication abuse, personality disorders, and other mental or behavioral disorders. |
